# Supplementary material
Source: PubMed Central journal article supplement (PMC3057414)

# Supplemental Figure 1

## Pre-vaccination

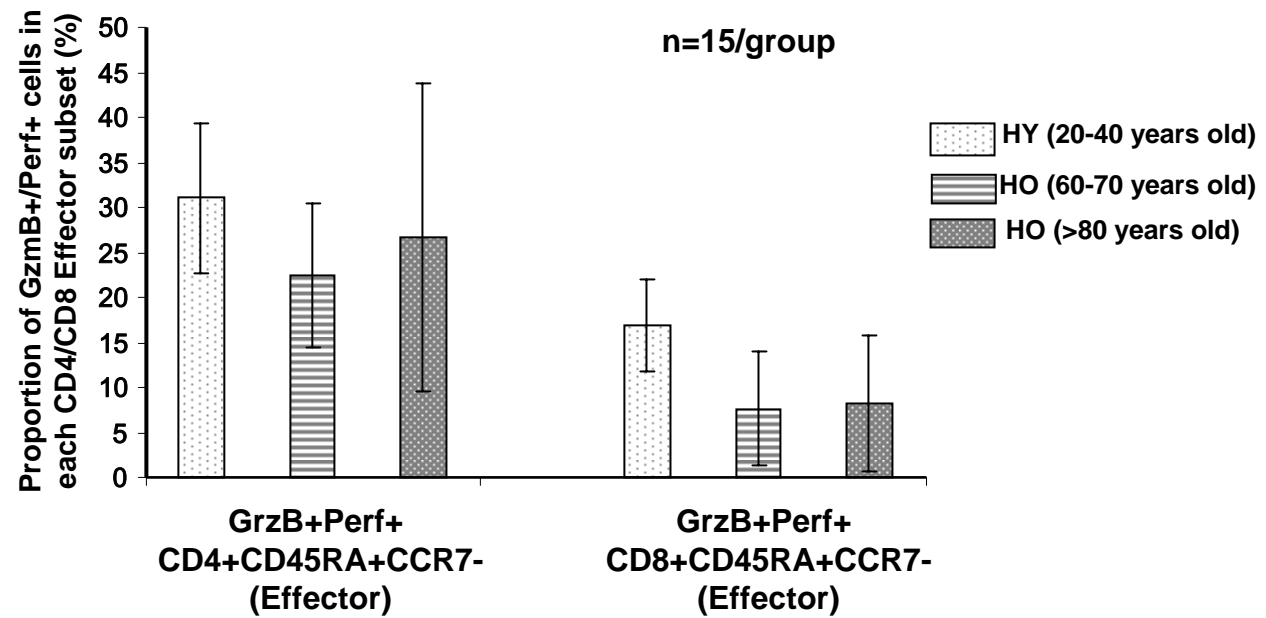

# Supplemental Figure 2

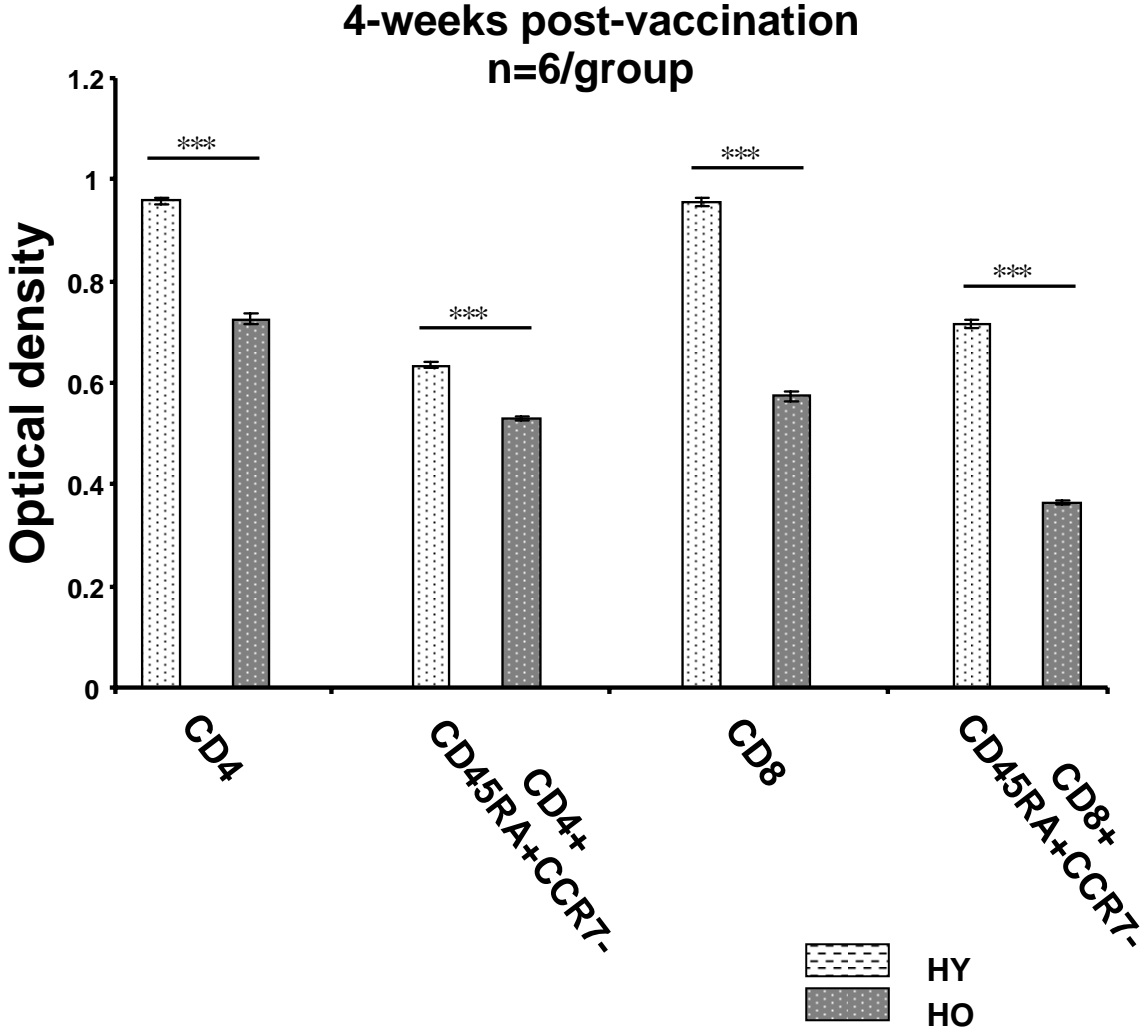

Supplement: NIHMS267695-supplement-01.pdf [file NIHMS267695-supplement-01.pdf]
